# Supplementary material
Source: Elsevier journal article supplement (https://www.sciencedirect.com/science/article/pii/S223878541831319X)
Supplement: mmc1 [file S223878541831319X:mmc1.docx]

**Appendix A. Supplementary Material**


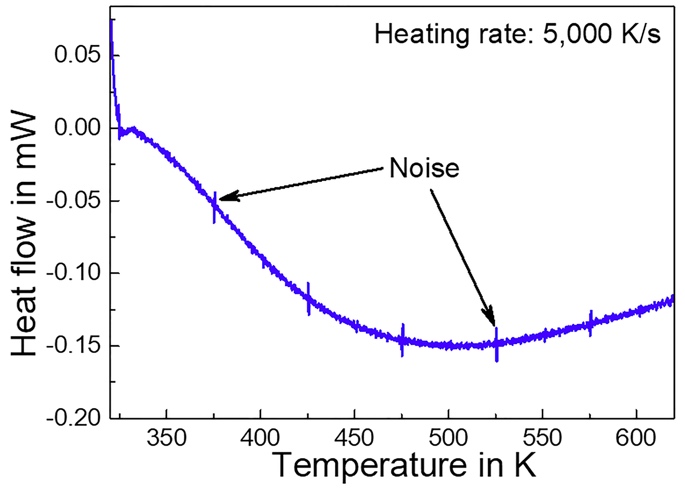


**Fig. S1** Nanocalorimetry heating curve of silicone oil. There are no possible peaks that can affect the glass transition and crystallization of Ce68Al10Cu20Co2 in this curve.

**
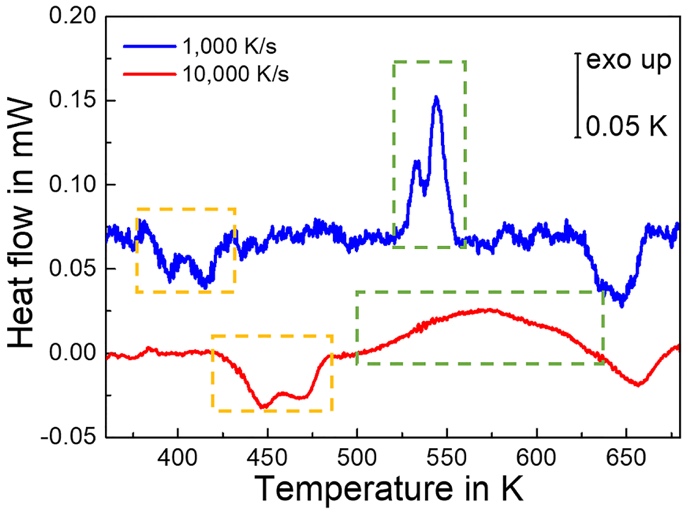
**

**Fig. S2** Nanocalorimetry heating curves of Ce68Al10Cu20Co2 at 1,000 and 10,000 K/s.


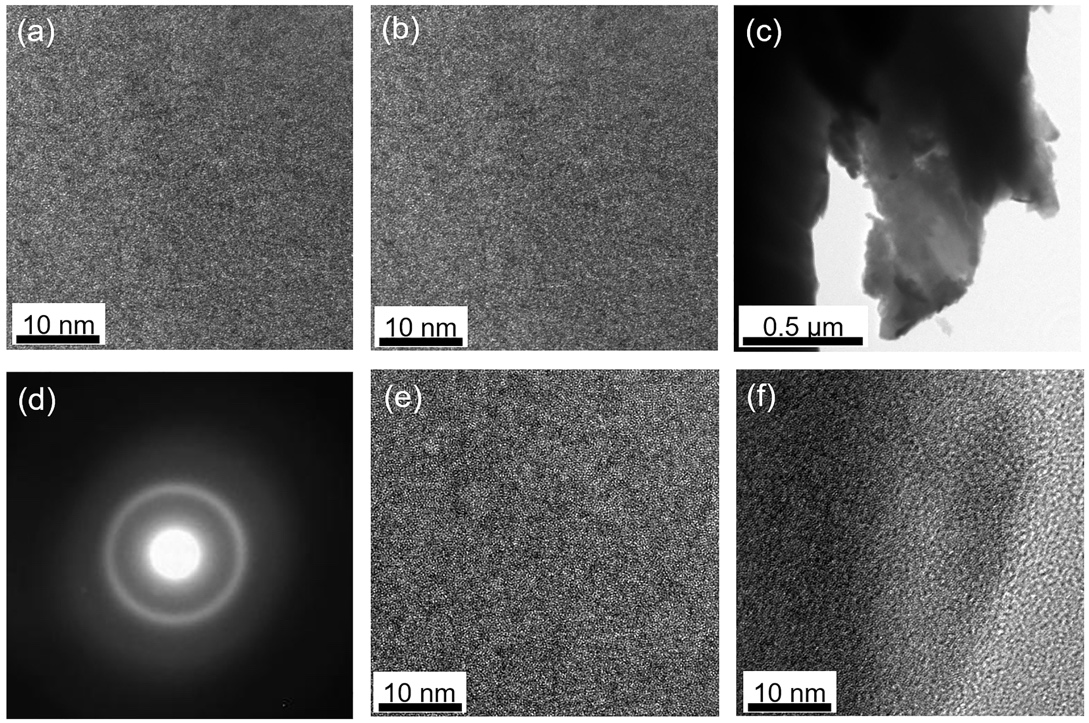


**Fig. S3** TEM images of the as-cast sample. (a) and (b) HRTEM images corresponding to the bright areas in Fig. 6b of the manuscript. (c) Bright-field image of the as-cast sample. (d) SAED pattern of the as-cast sample. (e) and (f) are HRTEM images correspond to the areas with various contrasts.
